# Supplementary material for: Postmating sexual selection and the enigmatic jawed genitalia of Callosobruchus subinnotatus
Source: Oxford University Press journal article supplement (doi:10.1242/bio.025684), 2017-01-01
Supplement: bio025684supp.pdf [file bio025684supp.pdf]

## Supplement

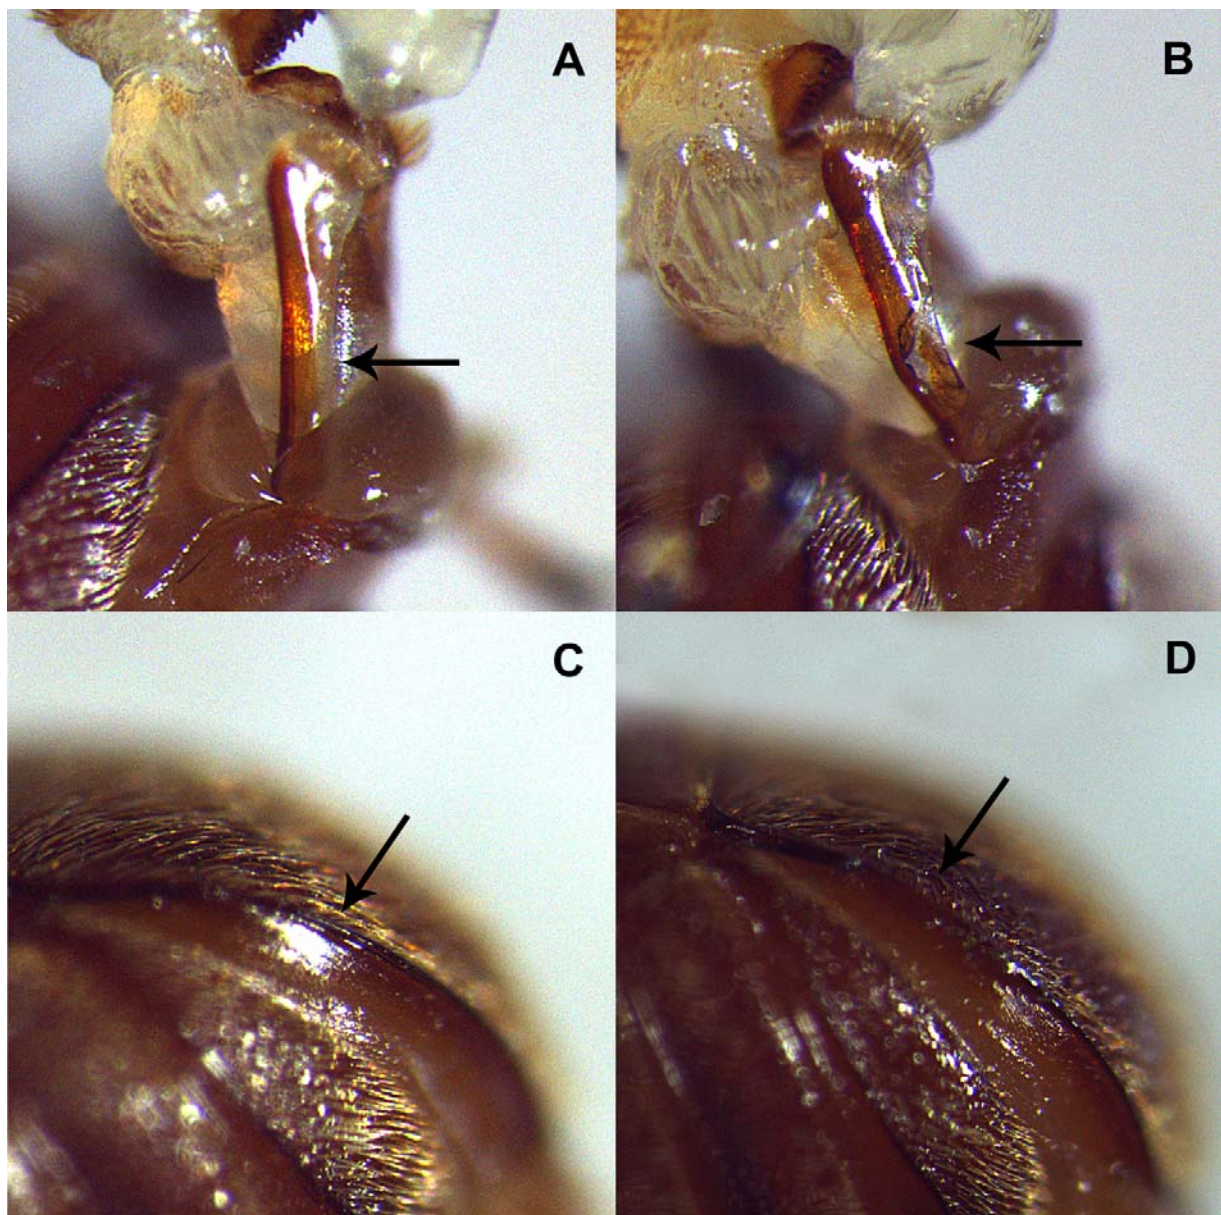

Fig. S1. **The two control treatments.** The parameres (A) were used to control for genital damage. The right paramere was therefore abraded by filing with a dentist drill (B). To control for genital ablation itself, an abdominal structure other than the genitalia was abraded, namely the pygidium (C). The rim of the left side of the pygidium was filed down (D).
